# Supplementary material
Source: PubMed Central journal article supplement (PMC4135883)
Supplement: AAC.03389-14_zac009143201so1.pdf [file AAC.03389-14_zac009143201so1.pdf]

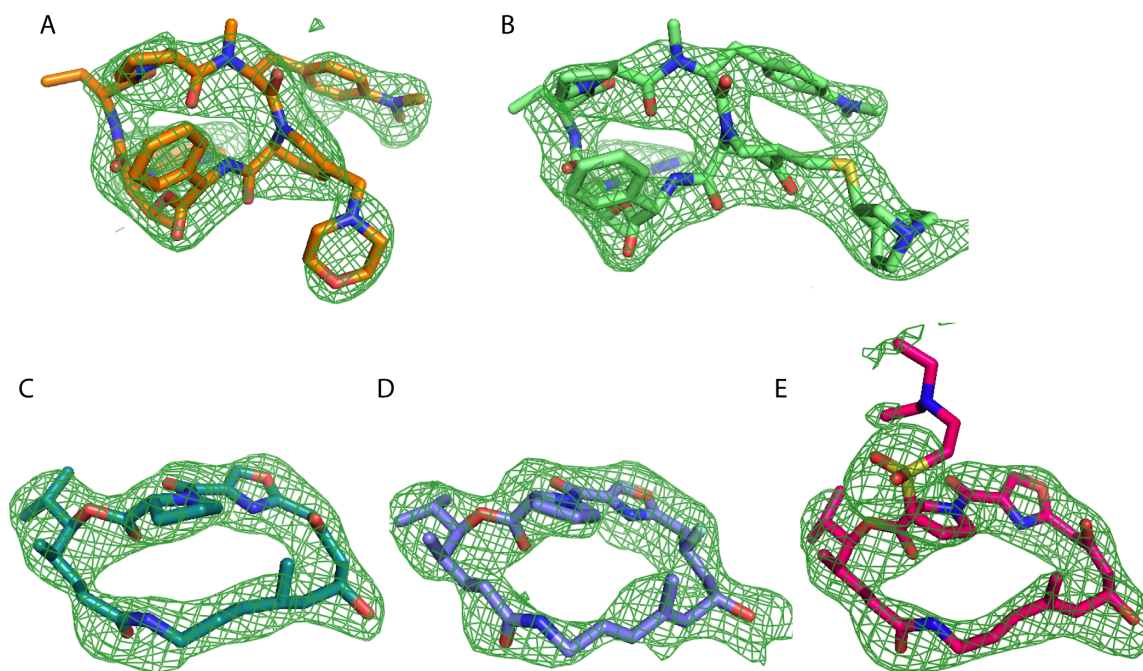

**FIG S1.** Unbiased difference electron density for streptogramin antibiotics with only one compound at a time bound to the ribosome. Unbiased  $F_{\text{obs}} - F_{\text{calc}}$  difference electron density contoured at 3.0 standard deviations from the mean is shown for A) linopristin, B) quinupristin, C) dalfopristin under hydrolyzing conditions, D) flopristin, and E) dalfopristin.

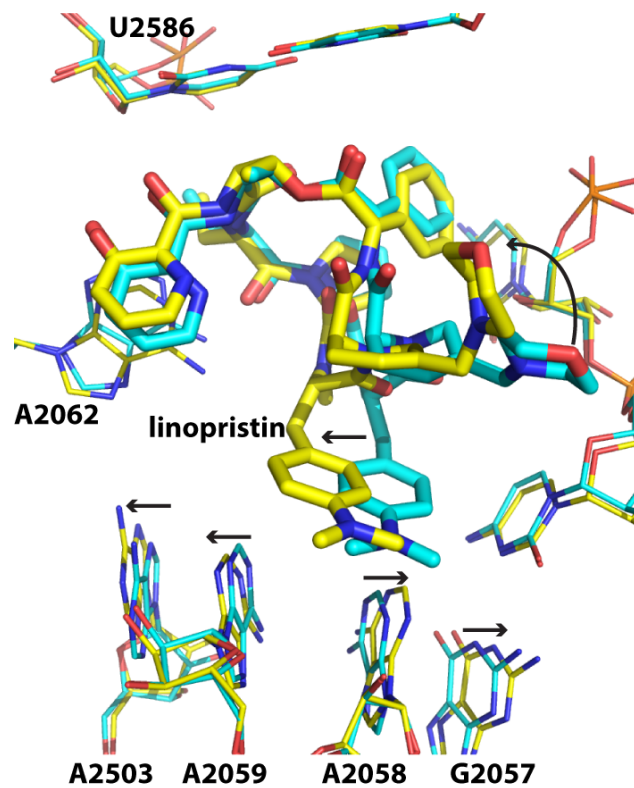

**FIG S2.** Binding of linopristin to the ribosome either alone or in the presence of flopristin. Structures of the 70S ribosome bound to either linopristin alone (yellow) or to the streptogramin combination NXL 103 (cyan) are shown. The differences between both structures are indicated by arrows.

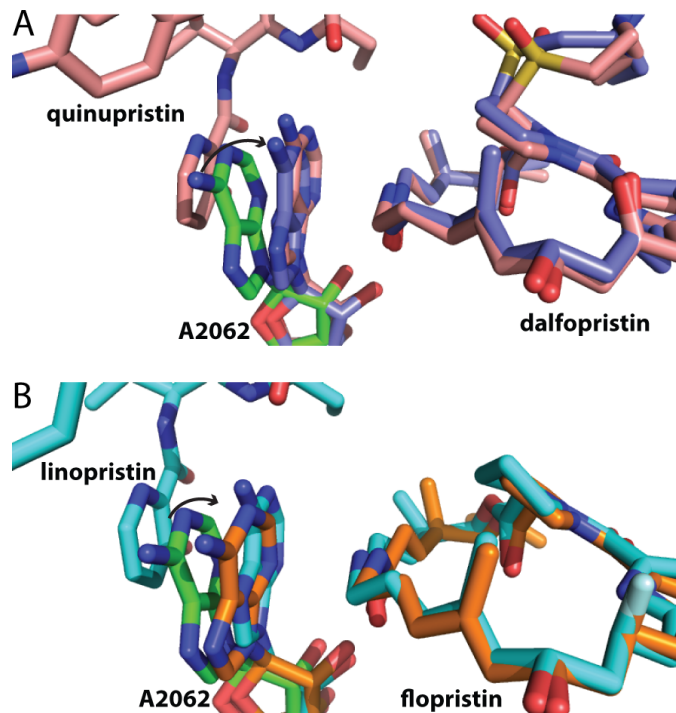

**FIG S3.** A pre-formed binding pocket for streptogramin B due to streptogramin A binding. A2062 is shown for the vacant ribosome (green), when ribosomes are bound to streptogramin A only, and when the combination of streptogramin A + B is bound. A) dalfopristin only (purple), dalfopristin + quinupristin (salmon). B) flopristin only (orange), flopristin + linopristin (cyan).

A

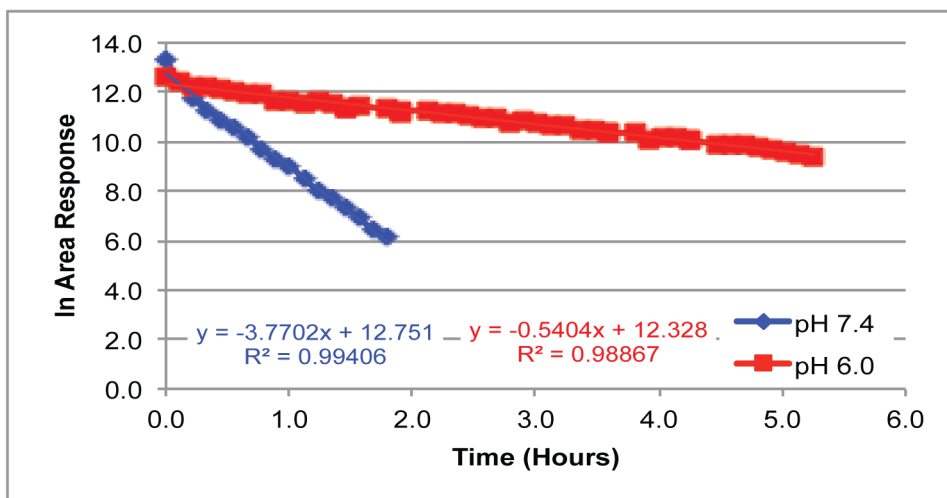

B

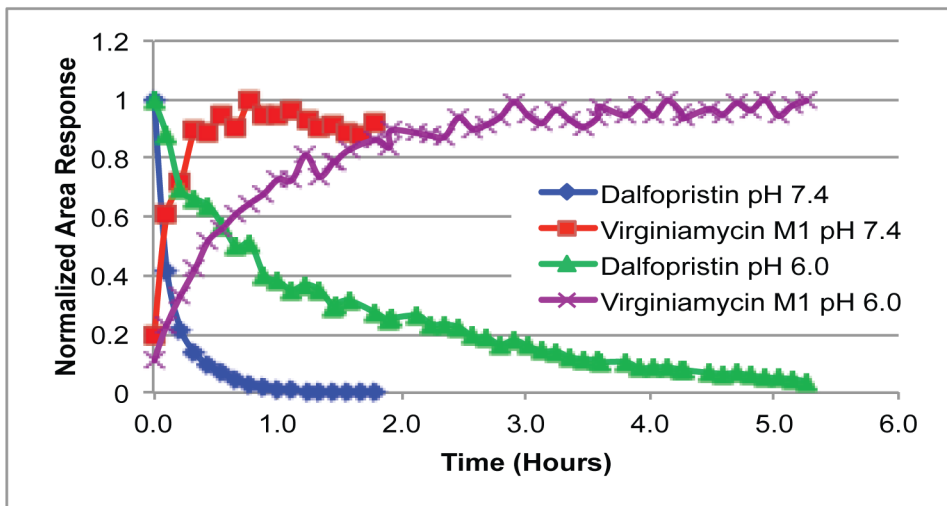

C

|                           | $t_{1/2}$ [hours] | % deviation |
|---------------------------|-------------------|-------------|
| Dalfopristin at pH 6.0    | 1.283             | 3.181       |
| Dalfopristin at pH 7.4    | 0.184             | 4.263       |
| Virginiamycin M at pH 7.4 | 44.917            | 16.129      |

**FIG S4.** Hydrolysis of dalfopristin as a function of pH. A) Natural log of the area responses plotted against time for dalfopristin in pH 6.0 CAMH II media and pH 7.4 phosphate buffer. B) Disappearance of dalfopristin and the formation of virginiamycin M, the normalized area responses of dalfopristin and virginiamycin M are plotted against time for pH 7.4 and pH 6.0. C) First-order derived half-lives ( $t_{1/2}$ ) based on the data in (A).

**A**

|                          |                        |      |      |                              |                         |      |      |      |      |      |
|--------------------------|------------------------|------|------|------------------------------|-------------------------|------|------|------|------|------|
|                          | 744                    | 753  | 1782 | 2015                         | 2055                    | 2067 | 2070 | 2439 | 2043 | 2052 |
| Bacillus_subtilis        | .....ACGUUGAAAAGU..... | AGCA | AA   | .....ACGAAAAGACCCGUGGAG..... | UACCCCGGGGAUAAACAG..... |      |      |      |      |      |
| Bacillus_anthraxis       | .....ACGUUGAAAAGU..... | AGCA | AA   | .....ACGAAAAGACCCGUGGAG..... | UACCCCGGGGAUAAACAG..... |      |      |      |      |      |
| Listeria_monocytogenes   | .....ACGUUGAAAAGU..... | AGCA | AA   | .....ACGAAAAGACCCGUGGAG..... | UACCCCGGGGAUAAACAG..... |      |      |      |      |      |
| Staphylococcus_aureus    | .....ACGUUGAAAAGU..... | AUCA | AA   | .....ACGAAAAGACCCGUGGAG..... | UACCCCGGGGAUAAACAG..... |      |      |      |      |      |
| Streptococcus_pneumoniae | .....ACGUUGAAAAGU..... | AUCA | AA   | .....ACGAAAAGACCCGUGGAG..... | UACCCUGGGGAUAAACAG..... |      |      |      |      |      |
| Streptococcus_pyogenes   | .....ACGUUGAAAAGU..... | AUCA | AA   | .....ACGAAAAGACCCGUGGAG..... | UACCCUGGGGAUAAACAG..... |      |      |      |      |      |
| Enterococcus_faecalis    | .....ACGUUGAAAAGU..... | AUCA | AA   | .....ACGAAAAGACCCGUGGAG..... | UACCCUGGGGAUAAACAG..... |      |      |      |      |      |
| Enterococcus_faecium     | .....ACGUUGAAAAGU..... | AUCA | AA   | .....ACGAAAAGACCCGUGGAG..... | UACCCUGGGGAUAAACAG..... |      |      |      |      |      |
| Lactobacillus_plantarum  | .....AAGUUGAAAAAU..... | AUCA | AA   | .....ACGAAAAGACCCGUGGAG..... | UACCCUGGGGAUAAACAG..... |      |      |      |      |      |
| Clostridium_difficile    | .....GCGUUGAAAAGC..... | ACCA | AA   | .....ACGAAAAGACCCGUGGAG..... | UACCCUGGGGAUAAACAG..... |      |      |      |      |      |
| Propionibacterium_avidum | .....CAGUUGAAAAGU..... | ACCA | AA   | .....ACGAAAAGACCCGUGGAG..... | UACCCCGGGGAUAAACAG..... |      |      |      |      |      |
| Escherichia_coli         | .....AUGUUGAAAAAU..... | AUUA | AA   | .....ACGAAAAGACCCGUGAAC..... | UACUCCGGGGAUAAACAG..... |      |      |      |      |      |
| Klebsiella_pneumoniae    | .....AUGUUGAAAAAU..... | AUUA | AA   | .....ACGAAAAGACCCGUGAAC..... | UACUCCGGGGAUAAACAG..... |      |      |      |      |      |
| Vibrio_cholerae          | .....AUGUUGAAAAAU..... | AUUA | AA   | .....ACGAAAAGACCCGUGAAC..... | UACUCCGGGGAUAAACAG..... |      |      |      |      |      |
| Haemophilus_influenzae   | .....AUGUUGAAAAAU..... | AUUA | AA   | .....ACGAAAAGACCCGUGAAC..... | UACUCCGGGGAUAAACAG..... |      |      |      |      |      |
| Moraxella_catarrhalis    | .....UCGUUGAAAAGC..... | AUUA | AA   | .....ACGAAAAGACCCGUGAAC..... | UACUCCGGGGAUAAACAG..... |      |      |      |      |      |
| Pseudomonas_aeruginosa   | .....CCGUUGAAAAGG..... | AUUA | AA   | .....ACGAAAAGACCCGUGAAC..... | UACUCCGGGGAUAAACAG..... |      |      |      |      |      |
| Legionella_pneumophila   | .....ACGUUGAAAAAU..... | AUUA | AA   | .....ACGAAAAGACCCGUGAAC..... | UACUCCGGGGAUAAACAG..... |      |      |      |      |      |

\*\*\*\*\* \* \* \*\* \*\*\*\*\* \* \* \* \*\*\*\*\*

|                          |                        |      |                              |                     |      |      |      |      |      |            |
|--------------------------|------------------------|------|------------------------------|---------------------|------|------|------|------|------|------------|
|                          | 2500                   | 2508 | 2553                         | 2572                | 2576 | 2580 | 2586 | 2601 | 2610 | gram stain |
| Bacillus_subtilis        | .....CCUCGAUGUCGG..... | UGU  | .....UACGCGAGCUGGGU UCA..... | ACAGUUCGGUCCCU..... | +    |      |      |      |      |            |
| Bacillus_anthraxis       | .....CCUCGAUGUCGG..... | UGU  | .....UACGCGAGCUGGGU UCA..... | ACAGUUCGGUCCCU..... | +    |      |      |      |      |            |
| Listeria_monocytogenes   | .....CCUCGAUGUCGG..... | UGU  | .....CACGCGAGCUGGGU UCA..... | ACAGUUCGGUCCCU..... | +    |      |      |      |      |            |
| Staphylococcus_aureus    | .....CCUCGAUGUCGG..... | UGU  | .....UACGCGAGCUGGGU UCA..... | ACAGUUCGGUCCCU..... | +    |      |      |      |      |            |
| Streptococcus_pneumoniae | .....CCUCGAUGUCGG..... | UGU  | .....CACGCGAGCUGGGU UCA..... | ACAGUUCGGUCCCU..... | +    |      |      |      |      |            |
| Streptococcus_pyogenes   | .....CCUCGAUGUCGG..... | UGU  | .....CACGCGAGCUGGGU UCA..... | ACAGUUCGGUCCCU..... | +    |      |      |      |      |            |
| Enterococcus_faecalis    | .....CCUCGAUGUCGG..... | UGU  | .....CACGCGAGCUGGGU UCA..... | ACAGUUCGGUCCCU..... | +    |      |      |      |      |            |
| Enterococcus_faecium     | .....CCUCGAUGUCGG..... | UGU  | .....CACGCGAGCUGGGU UCA..... | ACAGUUCGGUCCCU..... | +    |      |      |      |      |            |
| Lactobacillus_plantarum  | .....CCUCGAUGUCGG..... | UGU  | .....UACGCGAGCUGGGU UCA..... | ACAGUUCGGUCCCU..... | +    |      |      |      |      |            |
| Clostridium_difficile    | .....CCUCGAUGUCGG..... | UGU  | .....UACGCGAGCUGGGU UCA..... | ACAGUUCGGUCCCU..... | +    |      |      |      |      |            |
| Propionibacterium_avidum | .....CCUCGAUGUCGG..... | UGU  | .....CACGCGAGCUGGGU UCA..... | ACAGUUCGGUCCCU..... | +    |      |      |      |      |            |
| Escherichia_coli         | .....CCUCGAUGUCGG..... | UGU  | .....UACGCGAGCUGGGU UUA..... | ACAGUUCGGUCCCU..... | -    |      |      |      |      |            |
| Klebsiella_pneumoniae    | .....CCUCGAUGUCGG..... | UGU  | .....UACGCGAGCUGGGU UUA..... | ACAGUUCGGUCCCU..... | -    |      |      |      |      |            |
| Vibrio_cholerae          | .....CCUCGAUGUCGG..... | UGU  | .....UACGCGAGCUGGGU UUA..... | ACAGUUCGGUCCCU..... | -    |      |      |      |      |            |
| Haemophilus_influenzae   | .....CCUCGAUGUCGG..... | UGU  | .....UACGCGAGCUGGGU UUA..... | ACAGUUCGGUCCCU..... | -    |      |      |      |      |            |
| Moraxella_catarrhalis    | .....CCUCGAUGUCGG..... | UGU  | .....UACGCGAGCUGGGU UUA..... | ACAGUUCGGUCCCU..... | -    |      |      |      |      |            |
| Pseudomonas_aeruginosa   | .....CCUCGAUGUCGG..... | UGU  | .....UACGCGAGCUGGGU UUA..... | ACAGUUCGGUCCCU..... | -    |      |      |      |      |            |
| Legionella_pneumophila   | .....CCUCGAUGUCGG..... | UGU  | .....UACGCGAGCUGGGU UUA..... | ACAGUUCGGUCCCU..... | -    |      |      |      |      |            |

\*\*\*\*\* \*\* \*\*\*\*\* \* \*\*\*\*\*

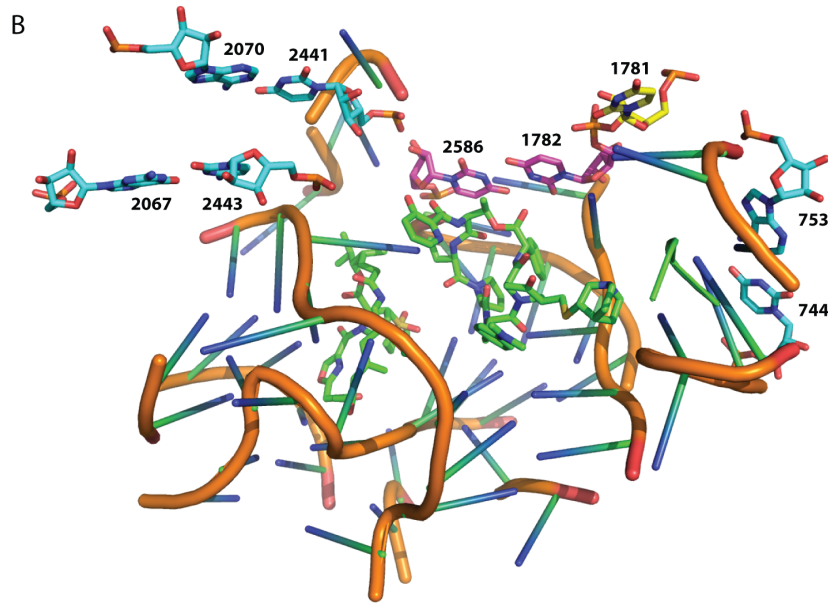

**FIG S5.** Sequence alignment of 23S rRNA of various Gram-positive and Gram-negative pathogens. A) Residues within 10Å of either streptogramin A or B component are shaded in red. Positions 1782-2586 (shaded in blue) form a base pair that lines the binding site of streptogramin B. Watson-Crick base pairs that are not conserved are indicated by red lines. The red asterisk indicates position 1781. B) Structure of Synercid (green sticks) with all residues shown that are within 10 Å of either streptogramin component. U1782-U2586 base pair is indicated by magenta sticks. Watson-Crick base pairs are shown in cyan sticks. Nucleotide 1781 is shown in yellow sticks.

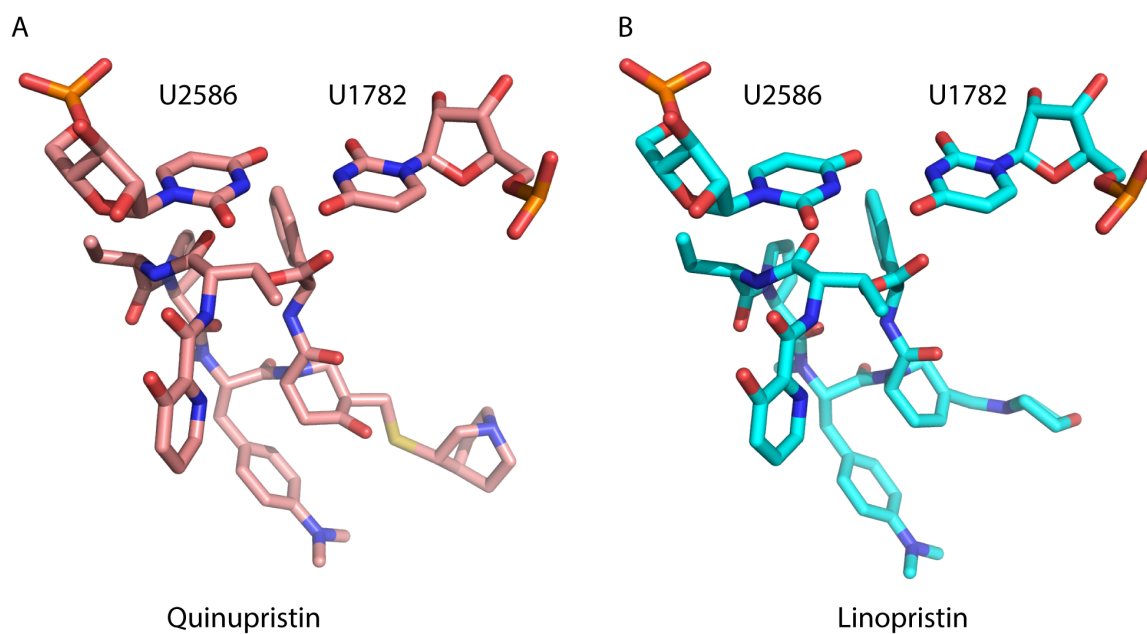

**FIG S6.** U-U base pair in the streptogramin B binding site. Structure of Synercid (A) and NXL 103 (B) with the U1782-U2586 base pair lining the binding site of the streptogramin B binding site.

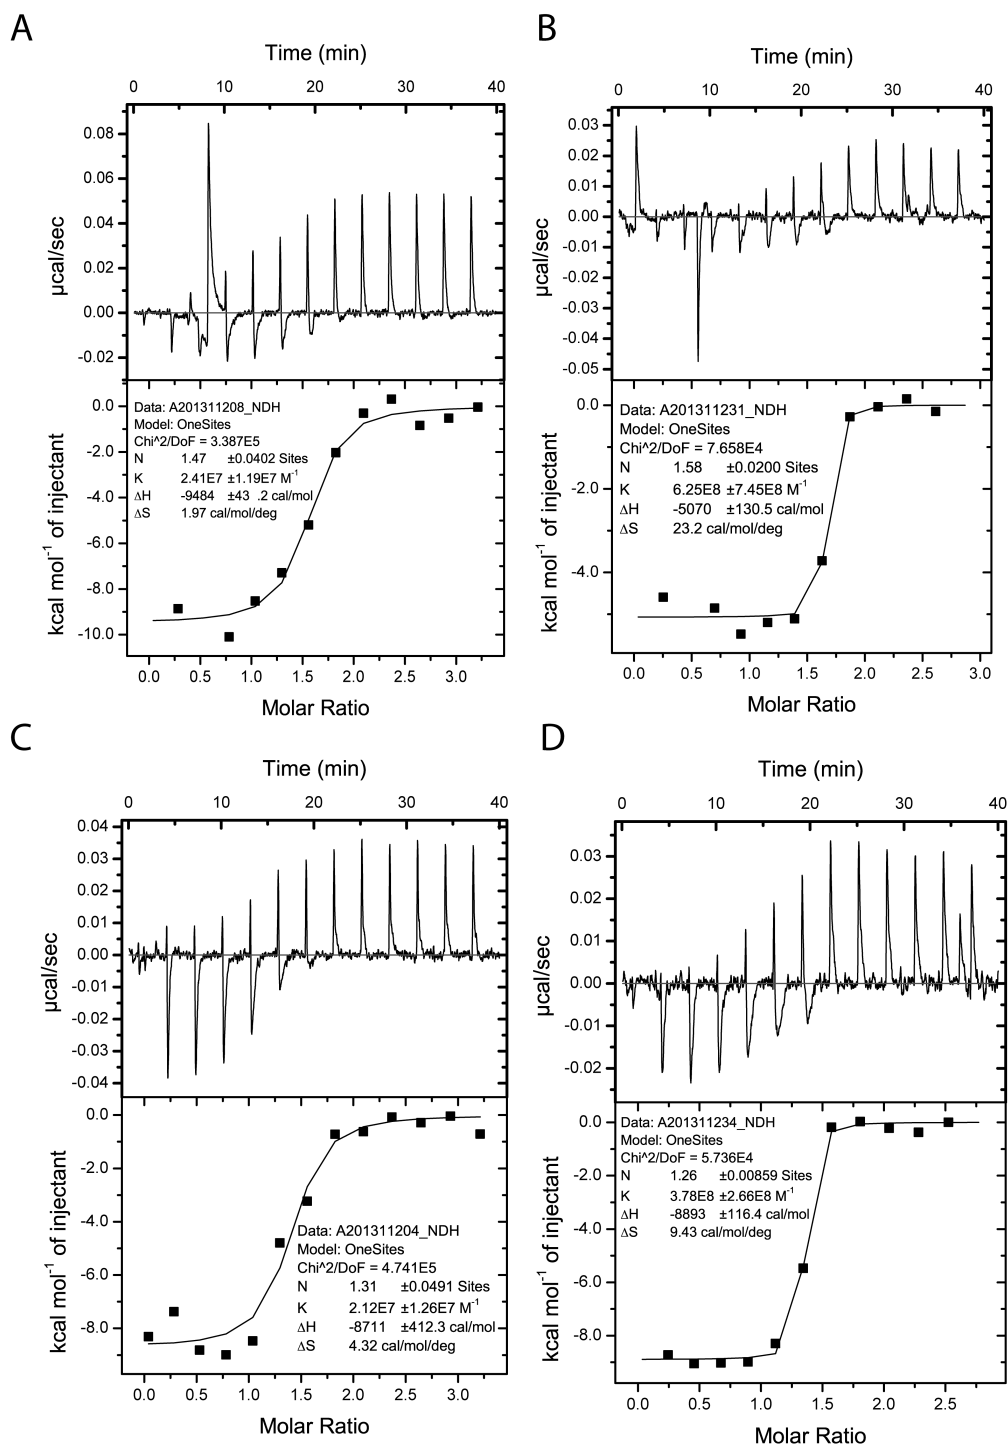

**FIG S7.** Isothermal titration calorimetry of ribosomes with streptogramins. A) Titration of the 70S ribosome with quinupristin. B) Titration of the 70S ribosome pre-bound to dalfofpristin with quinupristin. C) Titration of the 70S ribosome with linopristin. D) Titration of the 70S ribosome pre-bound to flofpristin with linopristin.



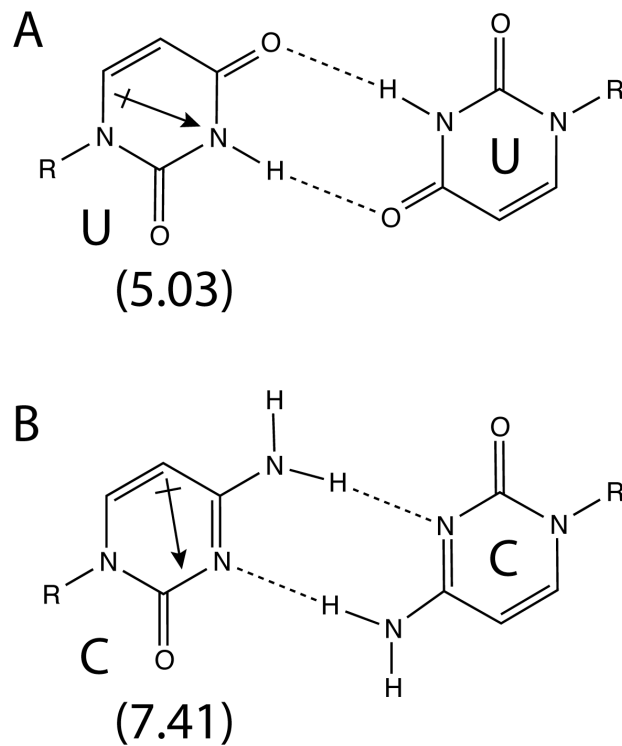

**FIG S8.** Chemical properties of U-U and C-C base pairs. The base pairing geometry and hydrogen bonding pattern is retained between a U-U (A) and a C-C (B) base pair however, the orientation of dipole moment vectors and their magnitude changes between a uracil (A) and a cytosine (B). Dipole moment vectors are indicated by an arrow and the magnitude of the dipole moment vector is shown in Debyes in parentheses.<sup>34</sup>

**Table S1.** Crystallographic data and refinement statistics

| Antibiotic                                   | NXL 103                       | Synercid                      | flopristin                    | lino-<br>pristin              | dalfo-<br>pristin             | quinu-<br>pristin             | dalfo-<br>pristin<br>hyd.     |
|----------------------------------------------|-------------------------------|-------------------------------|-------------------------------|-------------------------------|-------------------------------|-------------------------------|-------------------------------|
|                                              | Crystallographic statistics   |                               |                               |                               |                               |                               |                               |
| Space group                                  | P212121                       |
| Unit cell<br>dimensions<br>(Å <sup>3</sup> ) | 212.0 x<br>434.7 x<br>623.9   | 211.3 x<br>432.3 x<br>621.4   | 211.8 x<br>433.1 x<br>623.9   | 211.5 x<br>433.9 x<br>621.8   | 210.2 x<br>433.0 x<br>619.2   | 211.1 x<br>432.7 x<br>631.9   | 210.6 x<br>434.6 x<br>625.0   |
| Resolution (Å) <sup>a</sup>                  | 70 – 3.00<br>(2.90 –<br>2.80) | 70 – 3.00<br>(2.90 –<br>2.80) | 70 – 3.05<br>(3.00 –<br>2.90) | 70 – 3.15<br>(3.10 –<br>3.00) | 70 – 3.05<br>(3.00 –<br>2.90) | 70 – 3.05<br>(3.05 –<br>2.95) | 70 – 3.10<br>(3.00 –<br>2.90) |
| R <sub>meas</sub> (%) <sup>a</sup>           | 15.5<br>(107.6)               | 15.9<br>(143.2)               | 15.7<br>(76.6)                | 16.0<br>(107.6)               | 14.7<br>(93.5)                | 14.3<br>(81.4)                | 19.7<br>(99.6)                |
| I / σ (I) <sup>a</sup>                       | 5.38<br>(0.56)                | 6.62<br>(0.56)                | 4.39<br>(0.72)                | 4.76<br>(0.68)                | 6.77<br>(0.63)                | 5.04<br>(0.75)                | 3.9<br>0.55)                  |
| Completeness<br>(%) <sup>a</sup>             | 89.2<br>(86.8)                | 94.1<br>(87.6)                | 87.4<br>(75.3)                | 90.0<br>(86.2)                | 94.3<br>(87.1)                | 93.3<br>(88.6)                | 90.1<br>(80.6)                |
| Measurement<br>redundancy <sup>a</sup>       | 2.6 (2.0)                     | 3.2 (2.5)                     | 2.1 (2.0)                     | 2.8 (2.2)                     | 3.0 (2.13)                    | 1.8 (1.5)                     | 2.1 (1.9)                     |
| CC(1/2) (%) <sup>a</sup>                     | 99.2<br>(36.9)                | 99.4<br>(29.6)                | 98.9<br>(57.0)                | 99.5<br>(39.8)                | 99.3<br>(44.4)                | 99.1<br>(37.2)                | 98.4<br>(39.1)                |
|                                              | Refinement statistics         |                               |                               |                               |                               |                               |                               |
| Resolution (Å)                               | 70 – 2.8                      | 70 – 2.8                      | 70 – 2.9                      | 70 – 3.0                      | 70 – 2.9                      | 70 – 2.95                     | 70 – 2.9                      |
| No. Reflections                              | 1,244,949                     | 1,296,566                     | 1,093,642                     | 1,017,015                     | 1,169,356                     | 1,118,451                     | 1,126,727                     |
| R/R <sub>free</sub> (%)                      | 21.5 /<br>26.0                | 22.5 /<br>27.1                | 23.5 /<br>27.9                | 22.5 /<br>27.4                | 22.0 /<br>26.4                | 24.9 /<br>28.2                | 22.3 /<br>26.5                |
| No. Atoms                                    | 288,396                       | 288,423                       | 288,258                       | 288,320                       | 288,277                       | 288,328                       | 288,258                       |
| RMSD Bond<br>Length (Å)                      | 0.005                         | 0.004                         | 0.006                         | 0.007                         | 0.006                         | 0.006                         | 0.006                         |
| RMSD Angles<br>(°)                           | 0.902                         | 0.872                         | 1.113                         | 1.209                         | 1.069                         | 1.159                         | 1.094                         |

<sup>a</sup>Values in parentheses are given for highest resolution bin.

**Table S2.** IC50 values for individual streptogramin components determined by cell-free translation assays

|                         | U1782-U2586 <sup>a</sup> | C1782-C2586 <sup>b</sup> |
|-------------------------|--------------------------|--------------------------|
| dalfopristin            | 509 ± 36                 | 486 ± 15                 |
| hydrolyzed dalfopristin | 192 ± 19                 | 158 ± 12                 |
| virginiamycin M         | 182 ± 13                 | 169 ± 11                 |
| flopristin              | 130 ± 7                  | 145 ± 9                  |
| linopristin             | 513 ± 43                 | 269 ± 13                 |
| quinupristin            | 279 ± 31                 | 192 ± 6                  |

<sup>a</sup>Wild type *E. coli* cell extract bearing a U1782-U2586 base pair

<sup>b</sup>Mutant *E. coli* cell extract bearing a C1782-C2586 base pair reflecting the streptogramin binding pocket in Gram-positive pathogens.

Mean IC50 values (nM) from a representative experiment performed in triplicate are shown with standard deviation.

**Table S3.** IC<sub>50</sub> values of streptogramin A components in the presence of either linopristin or quinupristin at their respective IC<sub>50</sub> values<sup>a</sup> (exact values are indicated)

|                            | U1782-U2586 <sup>b</sup> |                         |                          | C1782-C2586 <sup>c</sup> |                         |                          |
|----------------------------|--------------------------|-------------------------|--------------------------|--------------------------|-------------------------|--------------------------|
|                            | single dose              | + 560 nM<br>linopristin | + 200 nM<br>quinupristin | single dose              | + 280 nM<br>linopristin | + 200 nM<br>quinupristin |
| dalfopristin               | 509 ± 36                 | 137 ± 27                | 187 ± 27                 | 486 ± 15                 | 303 ± 21                | 407 ± 24                 |
| hydrolyzed<br>dalfopristin | 192 ± 19                 | 122 ± 22                | 118 ± 27                 | 158 ± 12                 | 193 ± 26                | 259 ± 16                 |
| virginiamycin M            | 182 ± 13                 | 129 ± 14                | 110 ± 17                 | 169 ± 11                 | 193 ± 14                | 213 ± 11                 |
| flopristin                 | 130 ± 7                  | 92 ± 17                 | 94 ± 21                  | 145 ± 9                  | 159 ± 16                | 192 ± 16                 |

<sup>a</sup>Mean IC<sub>50</sub> values (nM) from a representative experiment performed in triplicate are shown with standard deviation.

<sup>b</sup>wild type *E. coli* cell extract bearing a U1782-U2586 base pair

<sup>c</sup>mutant *E. coli* cell extract bearing a C1782-C2586 base pair reflecting the streptogramin binding pocket in Gram-positive pathogens.

**Table S4.** IC<sub>50</sub> values of streptogramin B components in the presence of streptogramin A components at their respective IC<sub>50</sub> value (exact values are indicated)

|                                  | U1782-U2586 <sup>a</sup> |                           | C1782-C2586 <sup>a</sup> |                           |
|----------------------------------|--------------------------|---------------------------|--------------------------|---------------------------|
|                                  | linopristin <sup>c</sup> | quinupristin <sup>d</sup> | linopristin <sup>c</sup> | quinupristin <sup>d</sup> |
| single dose                      | 809 ± 47                 | 304 ± 26                  | 361 ± 17                 | 211 ± 23                  |
| + 500 nM dalfopristin            | 178 ± 25                 | 147 ± 18                  | 177 ± 12                 | 155 ± 11                  |
| + 150 nM hydrolyzed dalfopristin | 504 ± 54                 | 301 ± 35                  | 228 ± 23                 | 255 ± 17                  |
| + 150 nM virginiamycin M         | 707 ± 45                 | 279 ± 32                  | 349 ± 16                 | 261 ± 13                  |
| + 110 nM flopristin              | 711 ± 36                 | 314 ± 25                  | 351 ± 16                 | 268 ± 10                  |

<sup>a</sup>wild type *E. coli* cell extract bearing a U1782-U2586 base pair

<sup>b</sup>mutant *E. coli* cell extract bearing a C1782-C2586 base pair reflecting the streptogramin binding pocket in Gram-positive pathogens.

Absolute IC<sub>50</sub> values (nM) of either <sup>c</sup>only linopristin or <sup>d</sup>only quinupristin are different compared to Table S1 due to a different pipetting procedure (see Materials and Methods). Mean IC<sub>50</sub> values (nM) from a representative experiment performed in triplicate are shown with standard deviation.

**Table S5.**  $K_a$  values measured by isothermal titration calorimetry (ITC)

| Injectant    | Cell content      | $K_a$<br>[ $M^{-1}$ ] | $K_a$ error<br>[ $M^{-1}$ ] <sup>a</sup> | $K_a$ error<br>[% of $K_a$ ] <sup>b</sup> | $K_d$<br>[nM] <sup>c</sup> | $K_d$ error<br>[nM] <sup>d</sup> |
|--------------|-------------------|-----------------------|------------------------------------------|-------------------------------------------|----------------------------|----------------------------------|
| quinupristin | 70S               | 2.41E+07              | 1.19E+07                                 | 49                                        | 41.5                       | 20.5                             |
|              |                   | 4.23E+07              | 1.63E+07                                 | 39                                        | 23.6                       | 9.1                              |
|              |                   | 1.52E+07              | 5.07E+06                                 | 33                                        | 65.8                       | 21.9                             |
|              | 70 + dalfopristin | 8.75E+07              | 3.26E+07                                 | 37                                        | 11.4                       | 4.3                              |
|              |                   | 1.31E+08              | 1.18E+08                                 | 90                                        | 7.6                        | 6.9                              |
|              |                   | 6.25E+08              | 7.45E+08                                 | 119                                       | 1.6                        | 1.9                              |
| linopristin  | 70S               | 2.78E+07              | 1.46E+07                                 | 53                                        | 36.0                       | 19.0                             |
|              |                   | 2.12E+07              | 1.26E+07                                 | 59                                        | 47.2                       | 28.0                             |
|              |                   | 2.77E+07              | 1.07E+07                                 | 39                                        | 36.1                       | 13.9                             |
|              | 70S + flopristin  | 6.84E+07              | 1.12E+08                                 | 164                                       | 14.6                       | 23.9                             |
|              |                   | 5.90E+07              | 1.80E+07                                 | 31                                        | 16.9                       | 5.2                              |
|              |                   | 3.78E+08              | 2.66E+08                                 | 70                                        | 2.7                        | 1.9                              |

<sup>a</sup>Error in  $K_a$  from ITC experiment.

<sup>b</sup>The error in  $K_a$  is given as the percentage of  $K_a$ .

<sup>c</sup> $K_d$  is the inverse of  $K_a$ .

<sup>d</sup>The error in  $K_d$  results from the percentage error in  $K_a$  applied to  $K_d$ . All experiments were carried out in triplicate.
